# Supplementary material
Source: MDPI journal article supplement (https://www.mdpi.com/2410-3896/8/1/6)
Supplement: s1 [file s1]

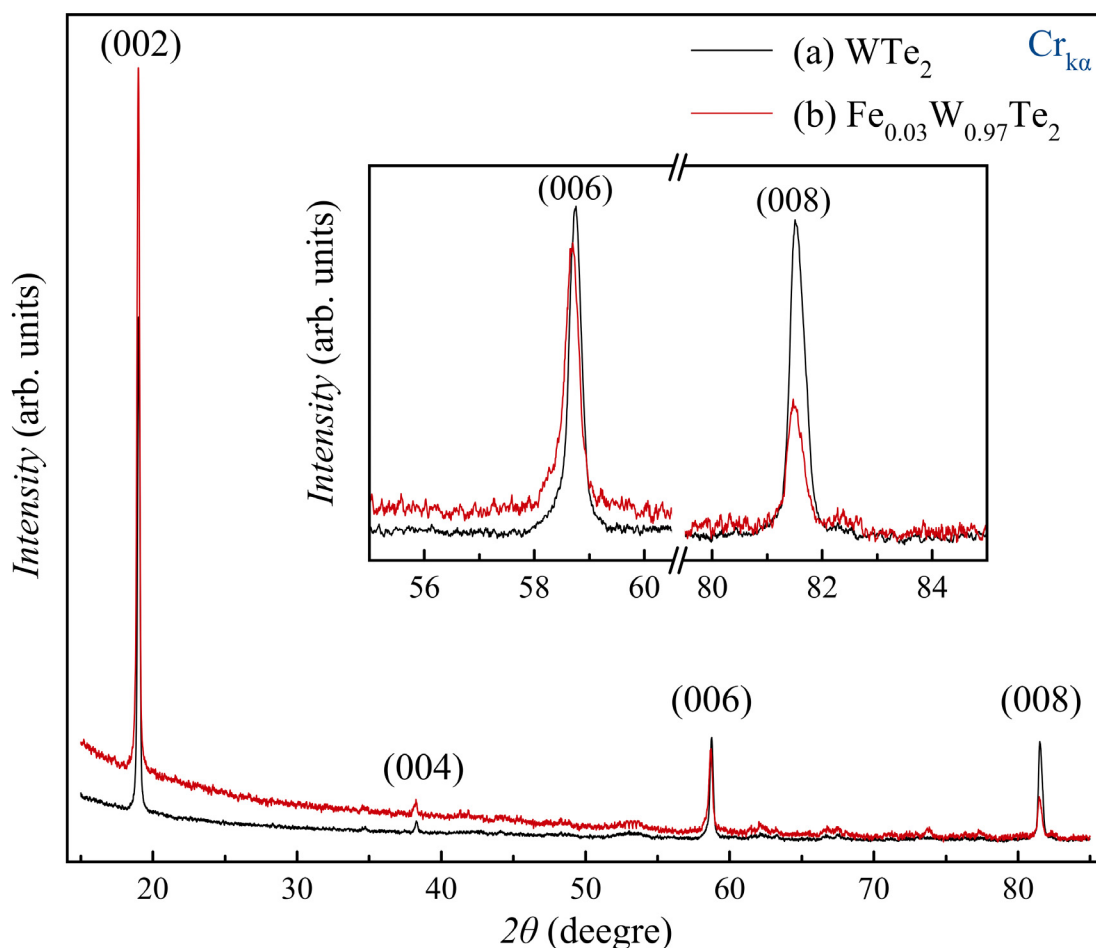

Figure S1. Comparison of X-ray diffraction (XRD) patterns for (a) WTe<sub>2</sub> and (b) Fe doped WTe<sub>2</sub>, respectively. The patterns correspond to the crystal plane (001). The inset shows scaled diffraction peaks.

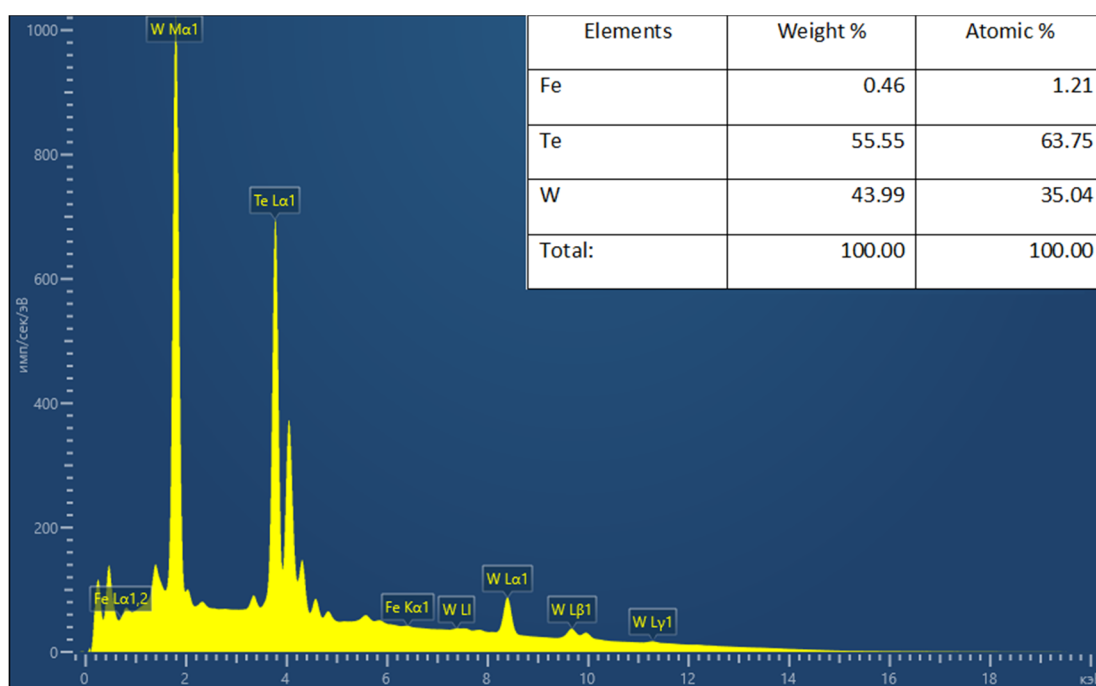

Figure S2. Area EDS spectrum and table for the atomic and weight percentage of the elements.
